# Supplementary material for: An Individualized Multi-Modal Approach for Detection of Medication “Off” Episodes in Parkinson’s Disease via Wearable Sensors
Source: MDPI journal article supplement (doi:10.3390/jpm13020265), 2023-01-31
Supplement: s1 [file s1]

## Supplementary Materials

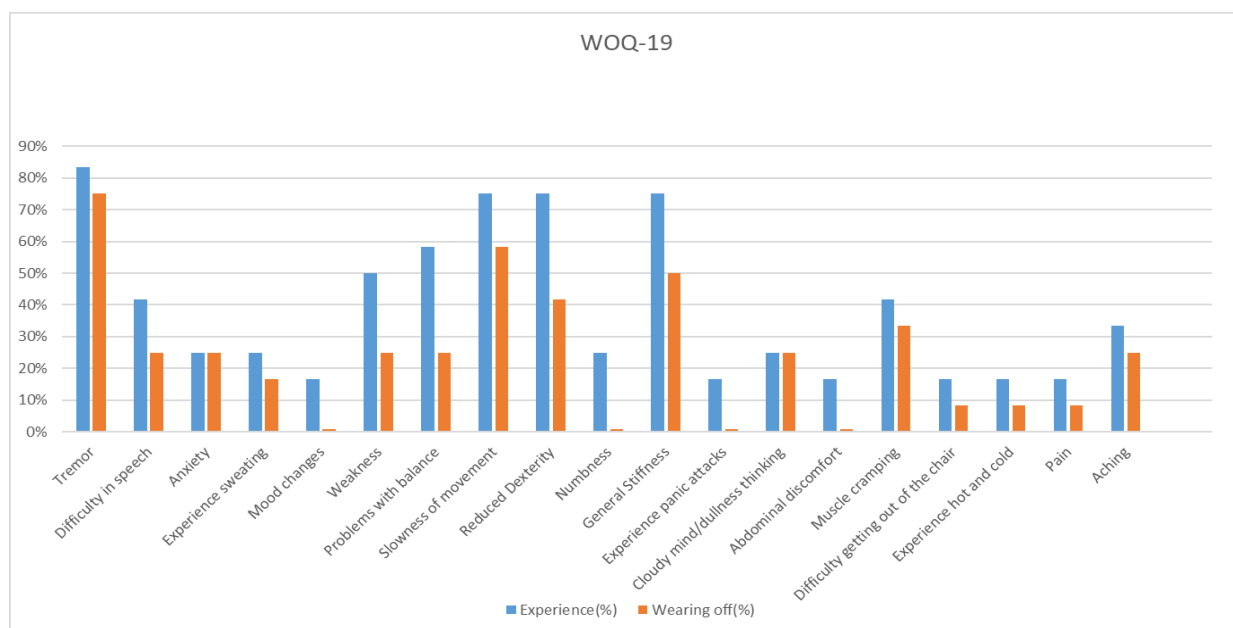

**Figure S1.** Percentage of experienced and wearing-off symptoms assessed through WOQ-19.

(A)

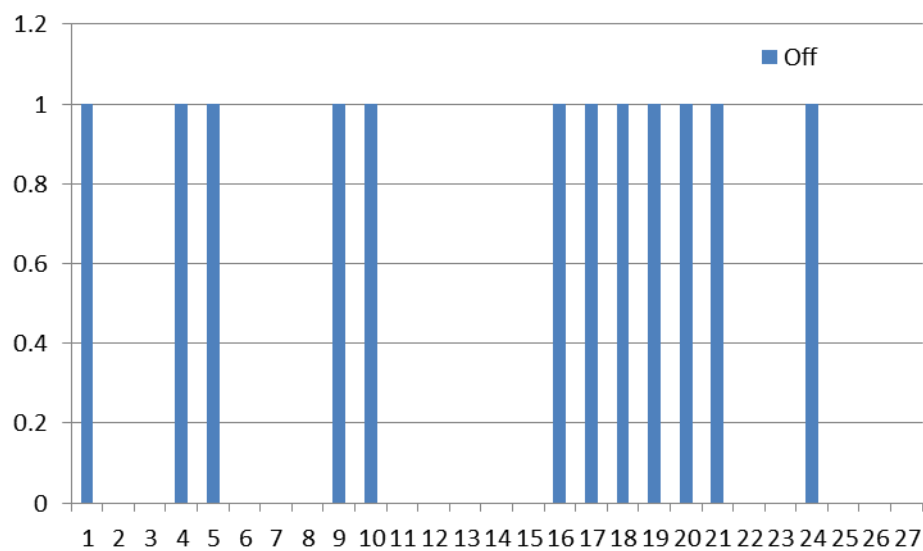

(B)

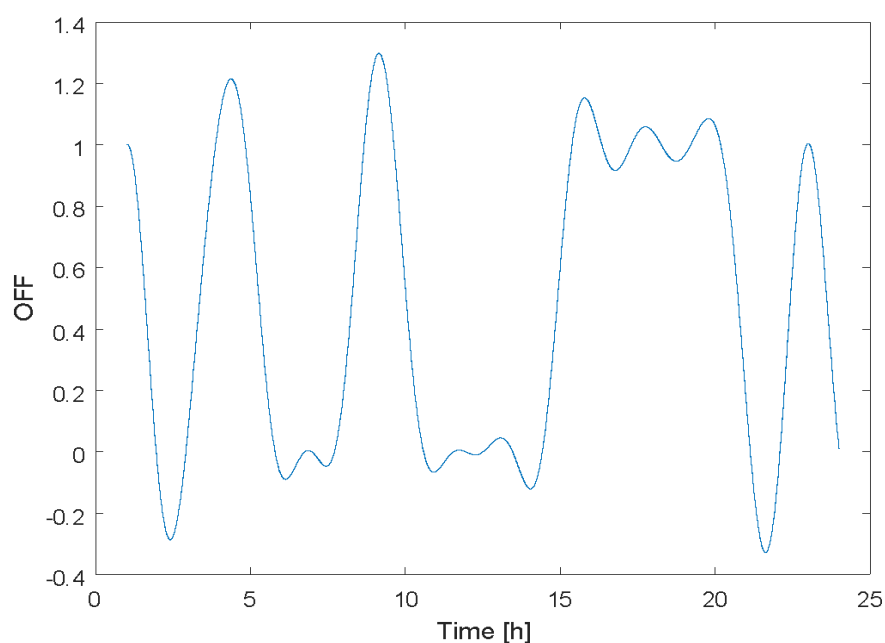

**Figure S2.** OFF state of the first subject. (A) The 24-element reported vector of OFF state. (B) Resampled OFF signal.

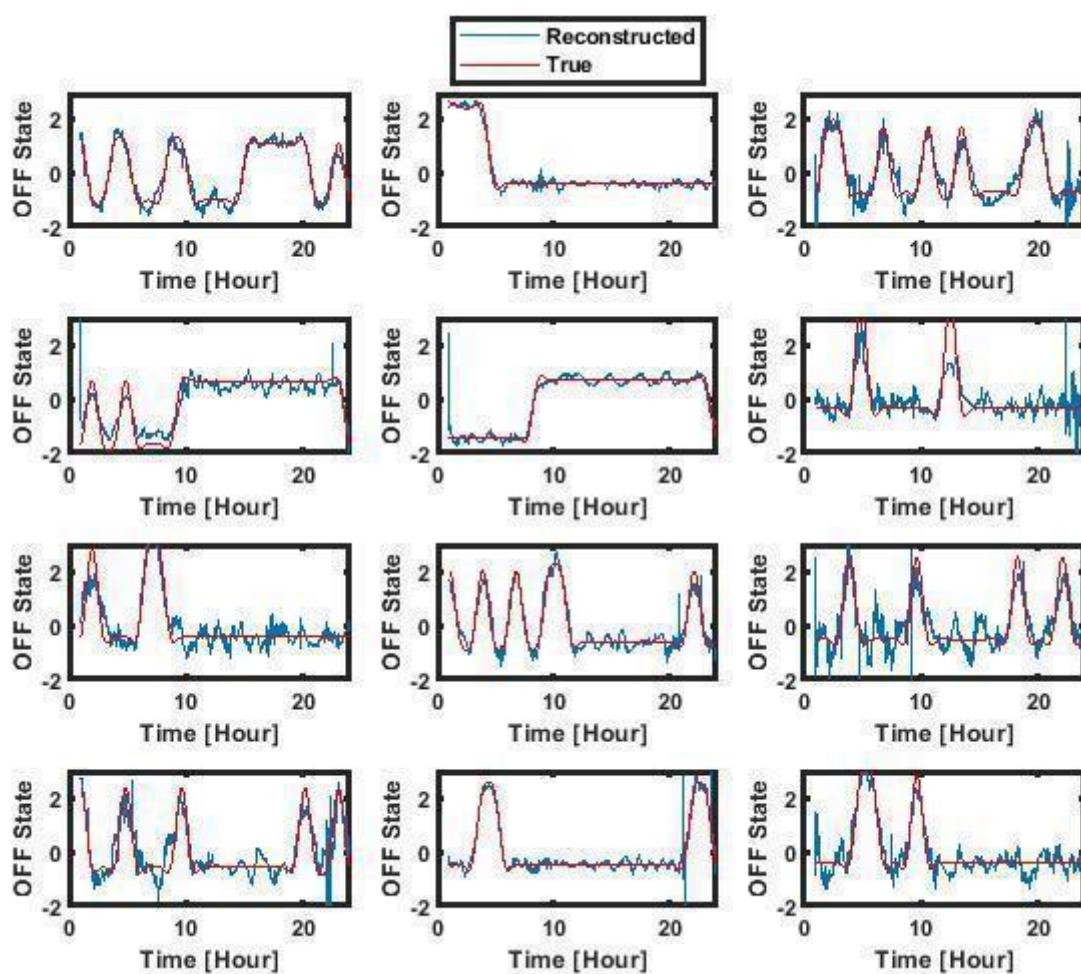

**Figure S3.** Reconstructed vs. true (centralized) OFF states for each subject .

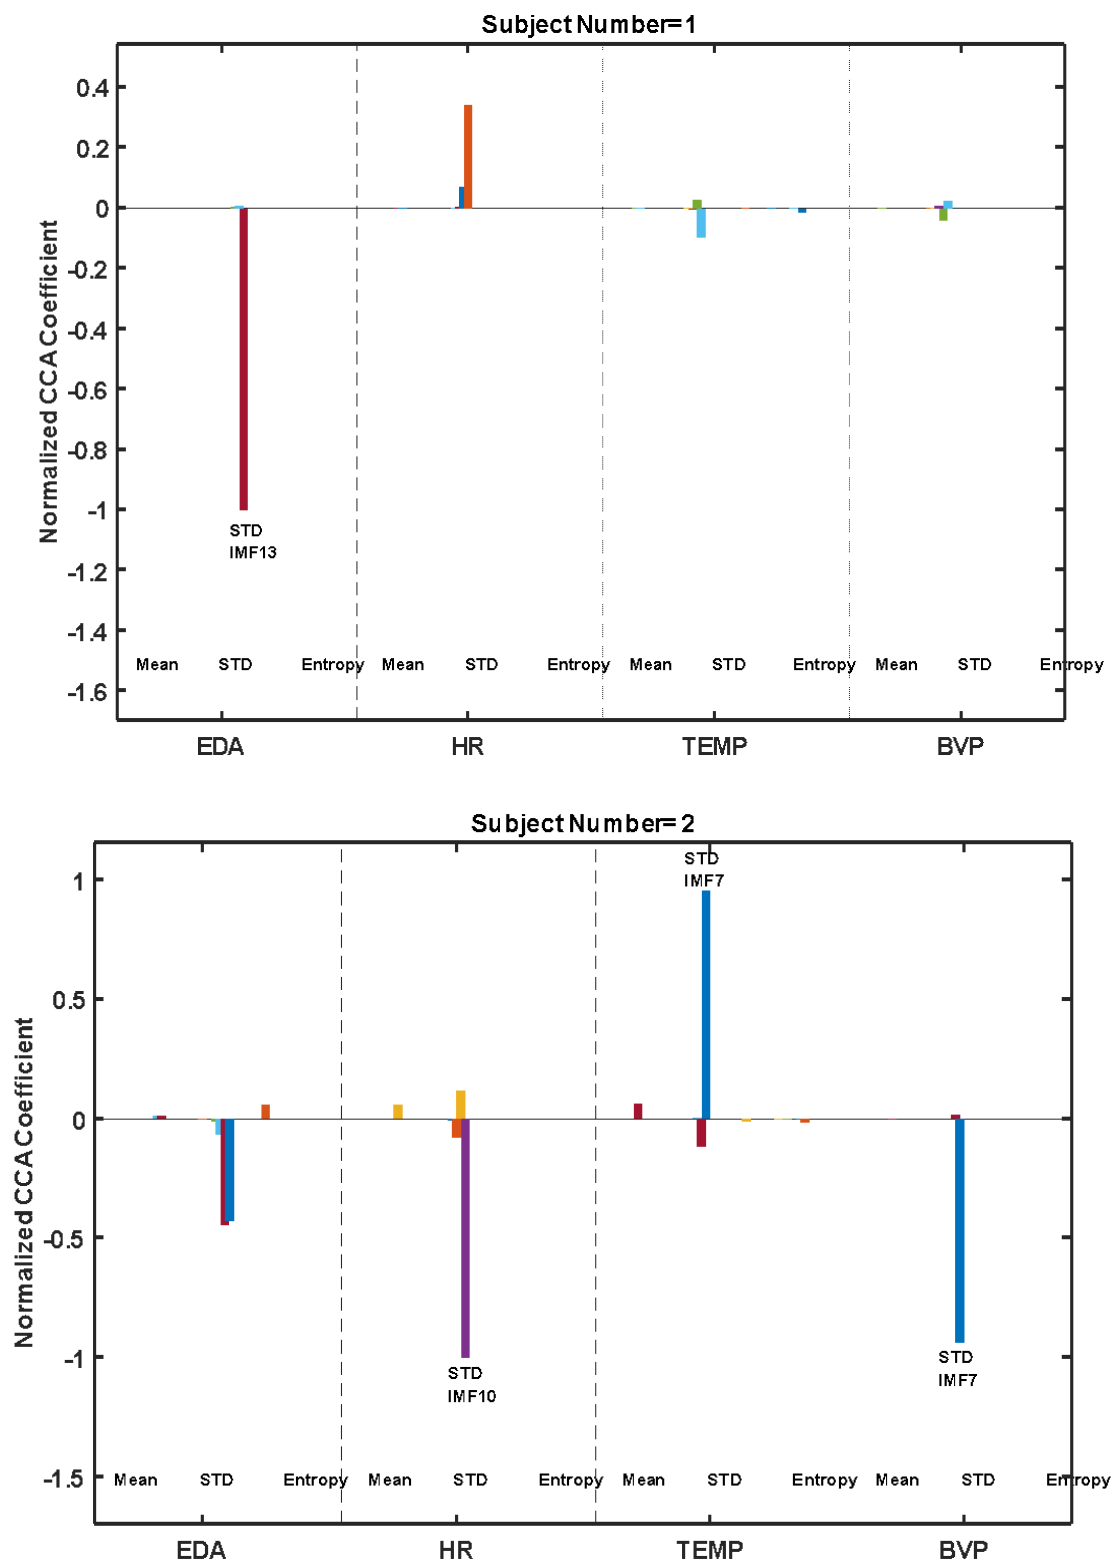

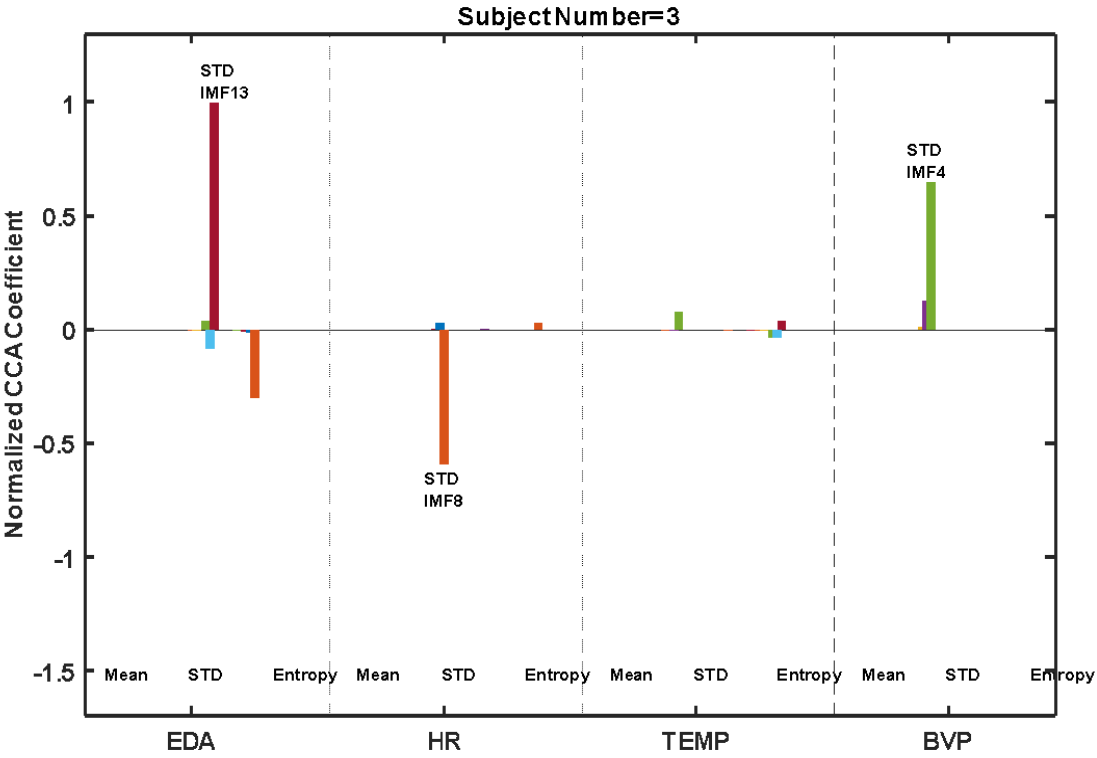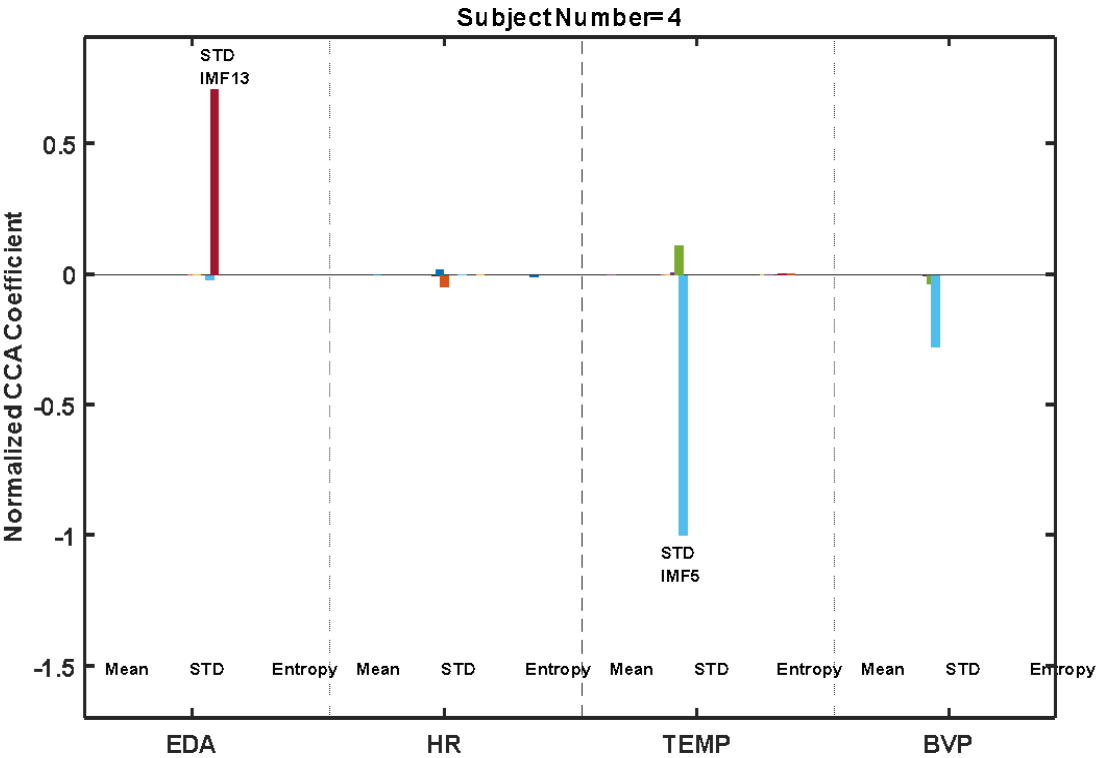

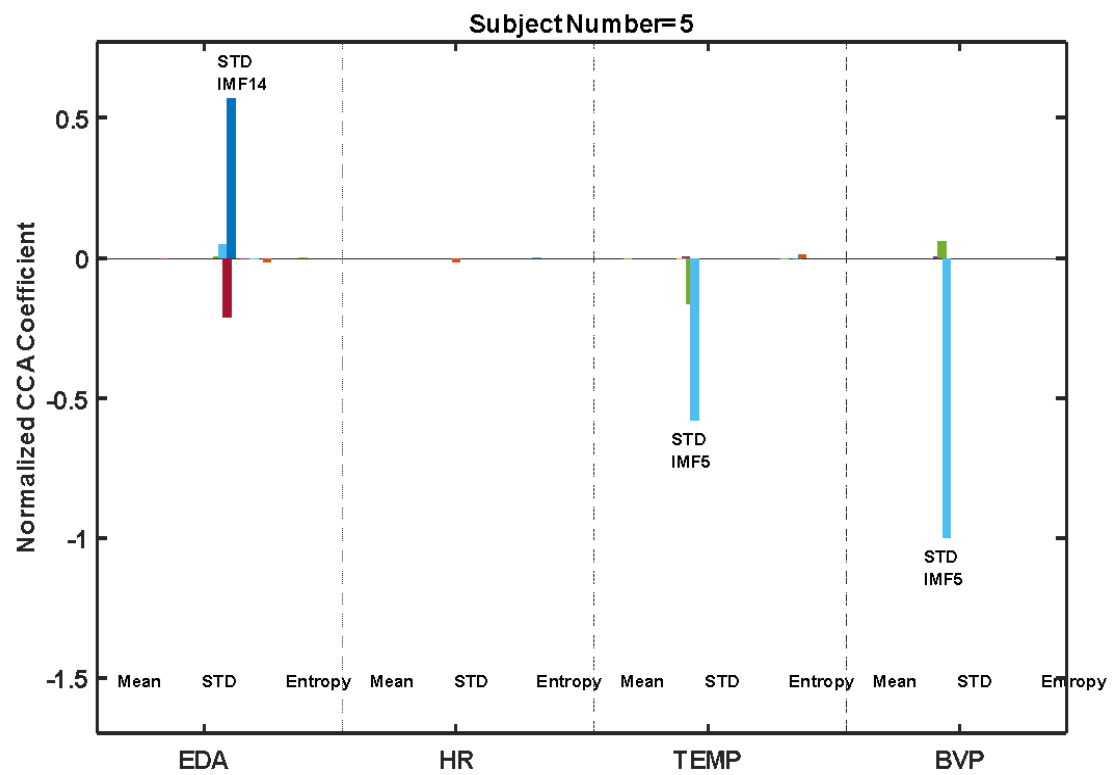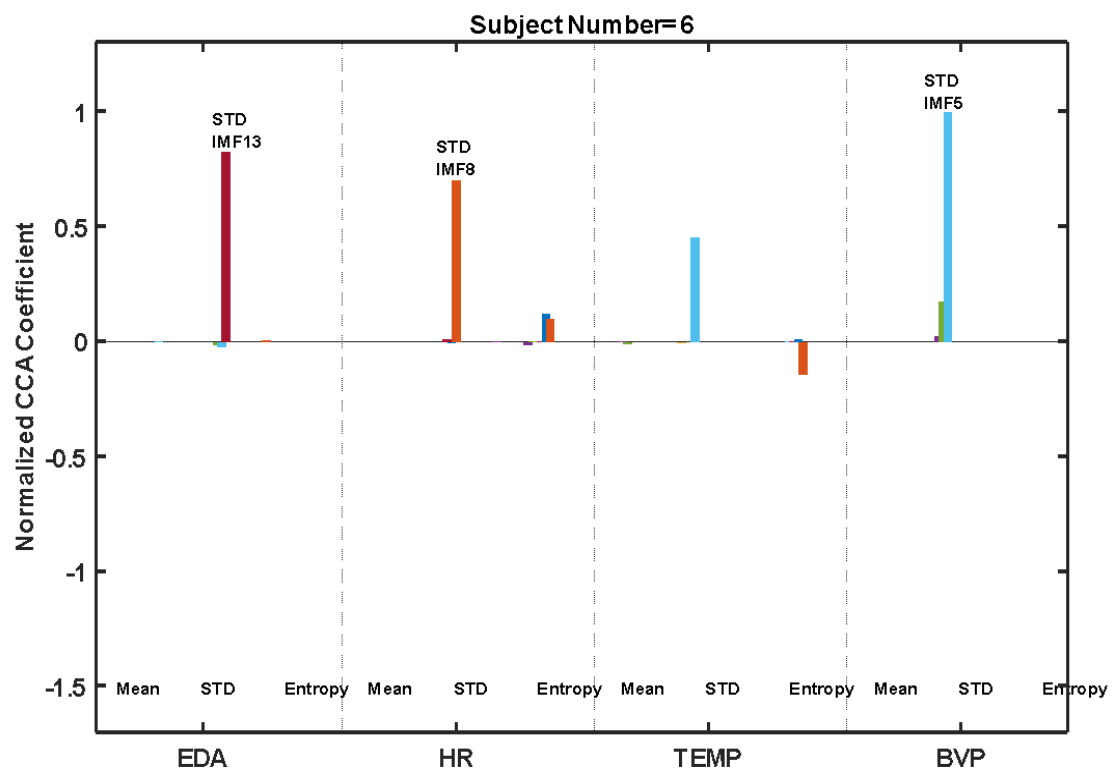

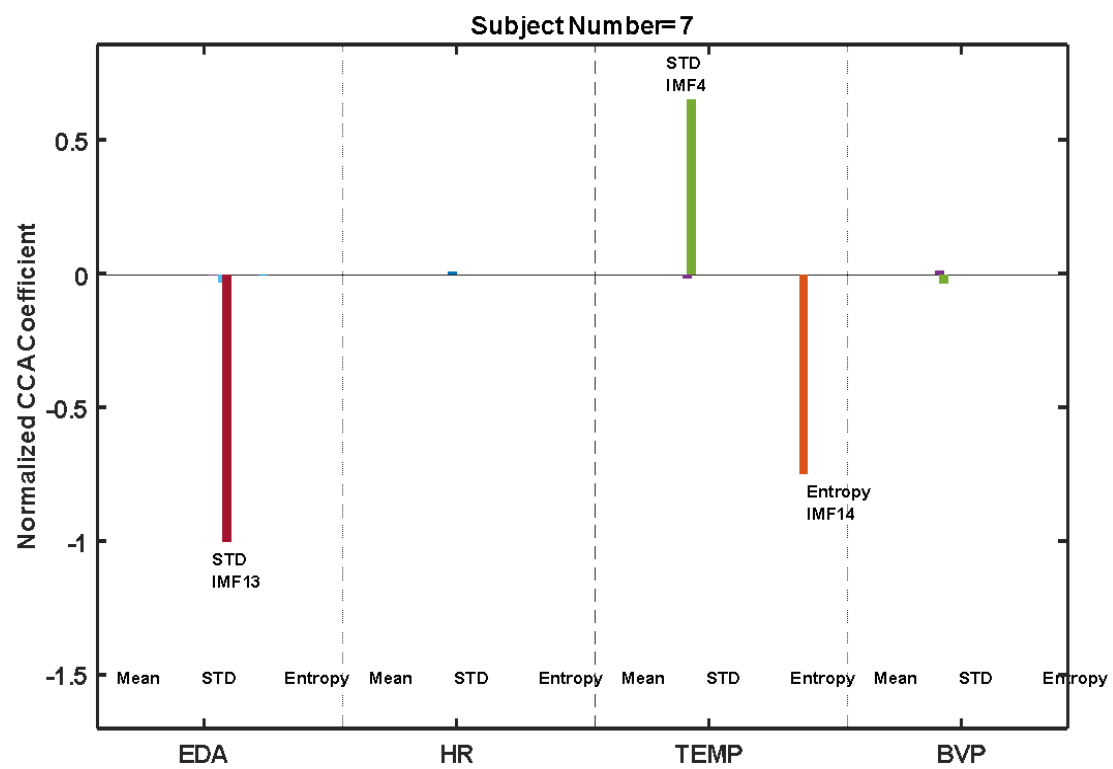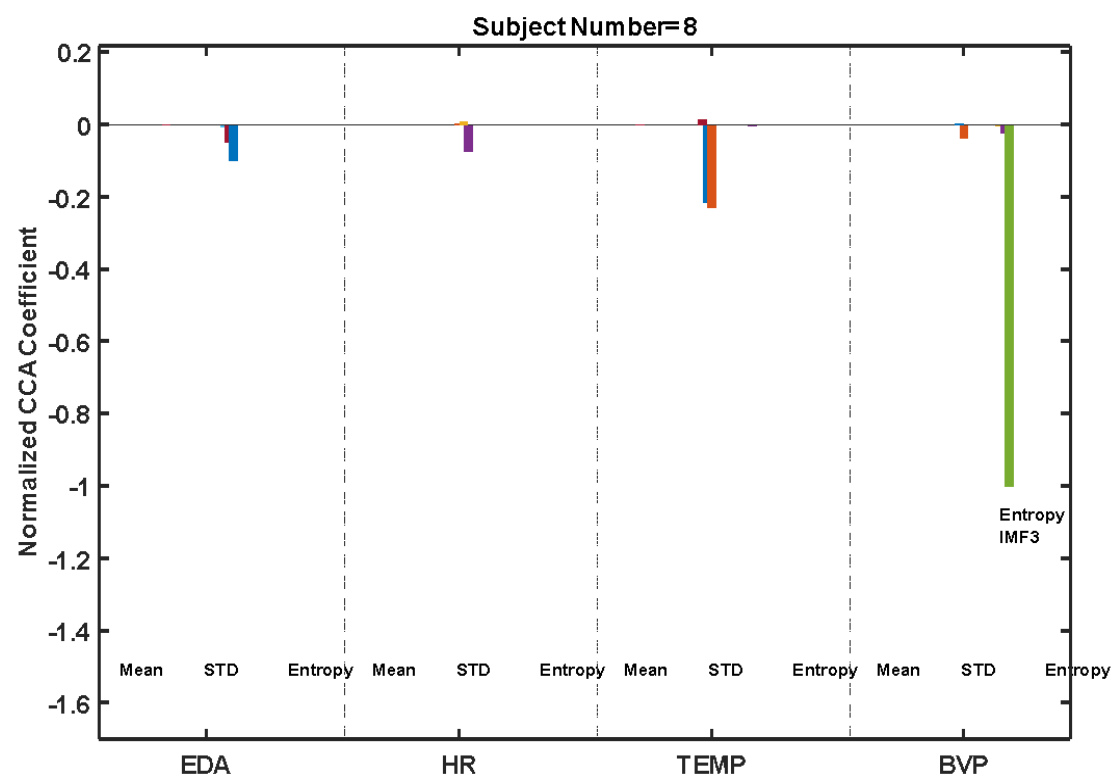

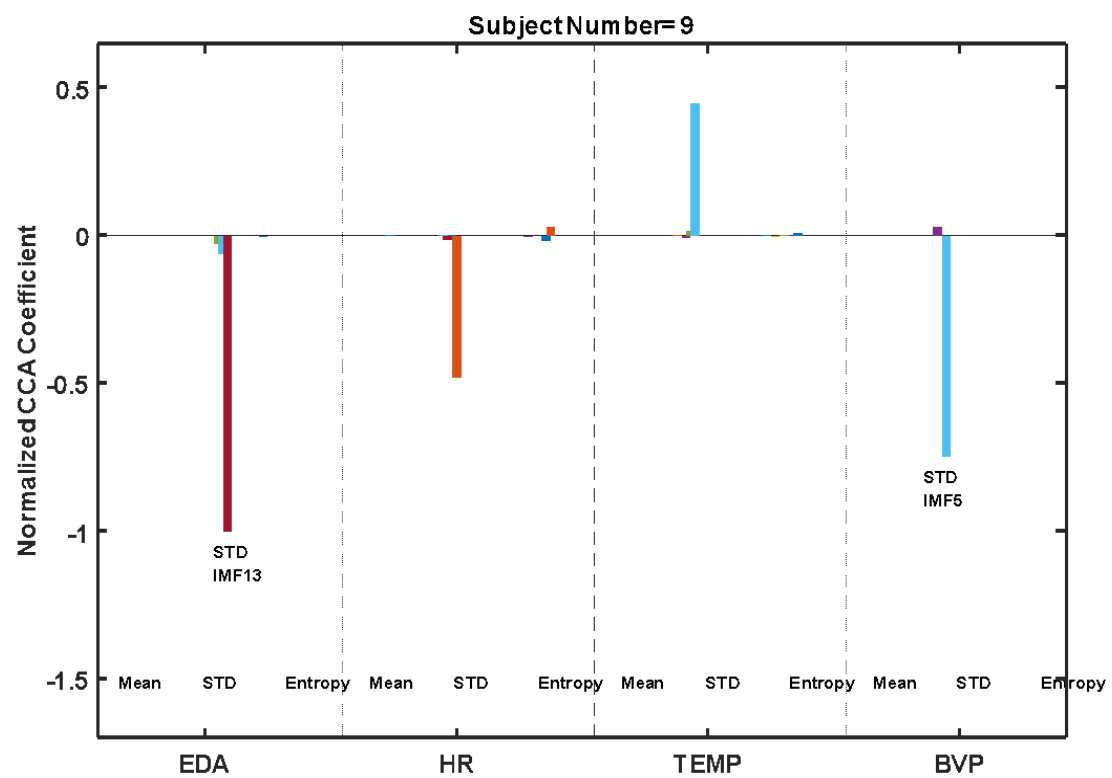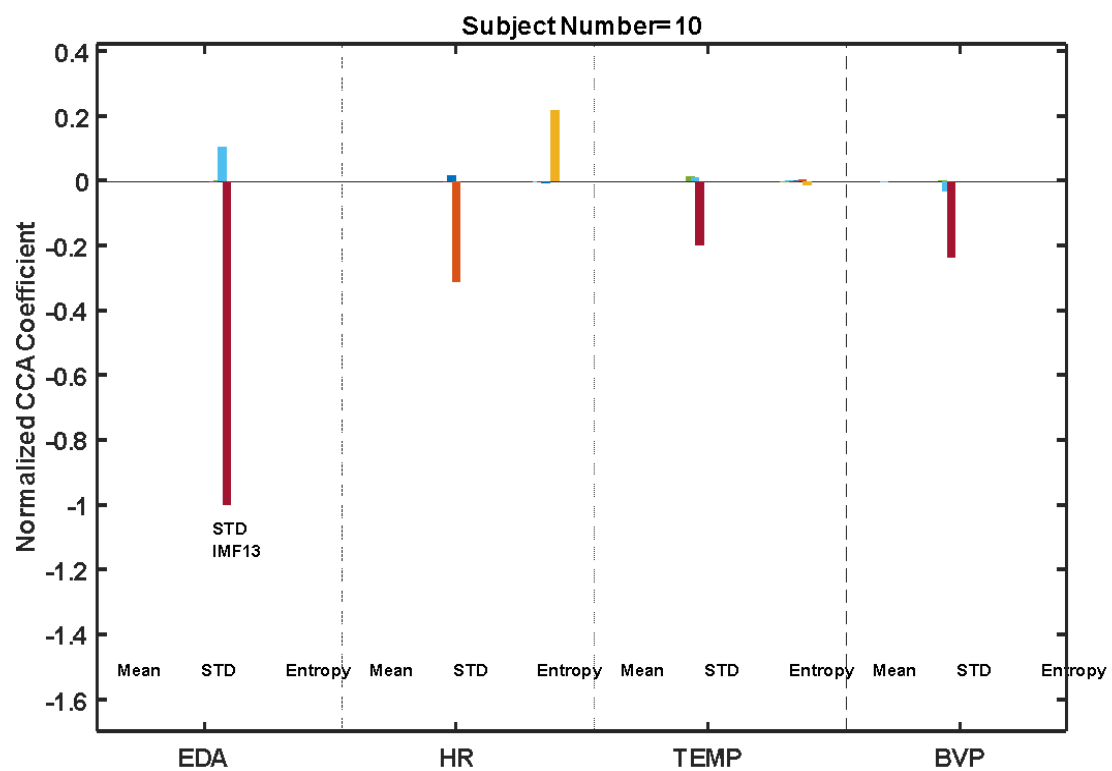

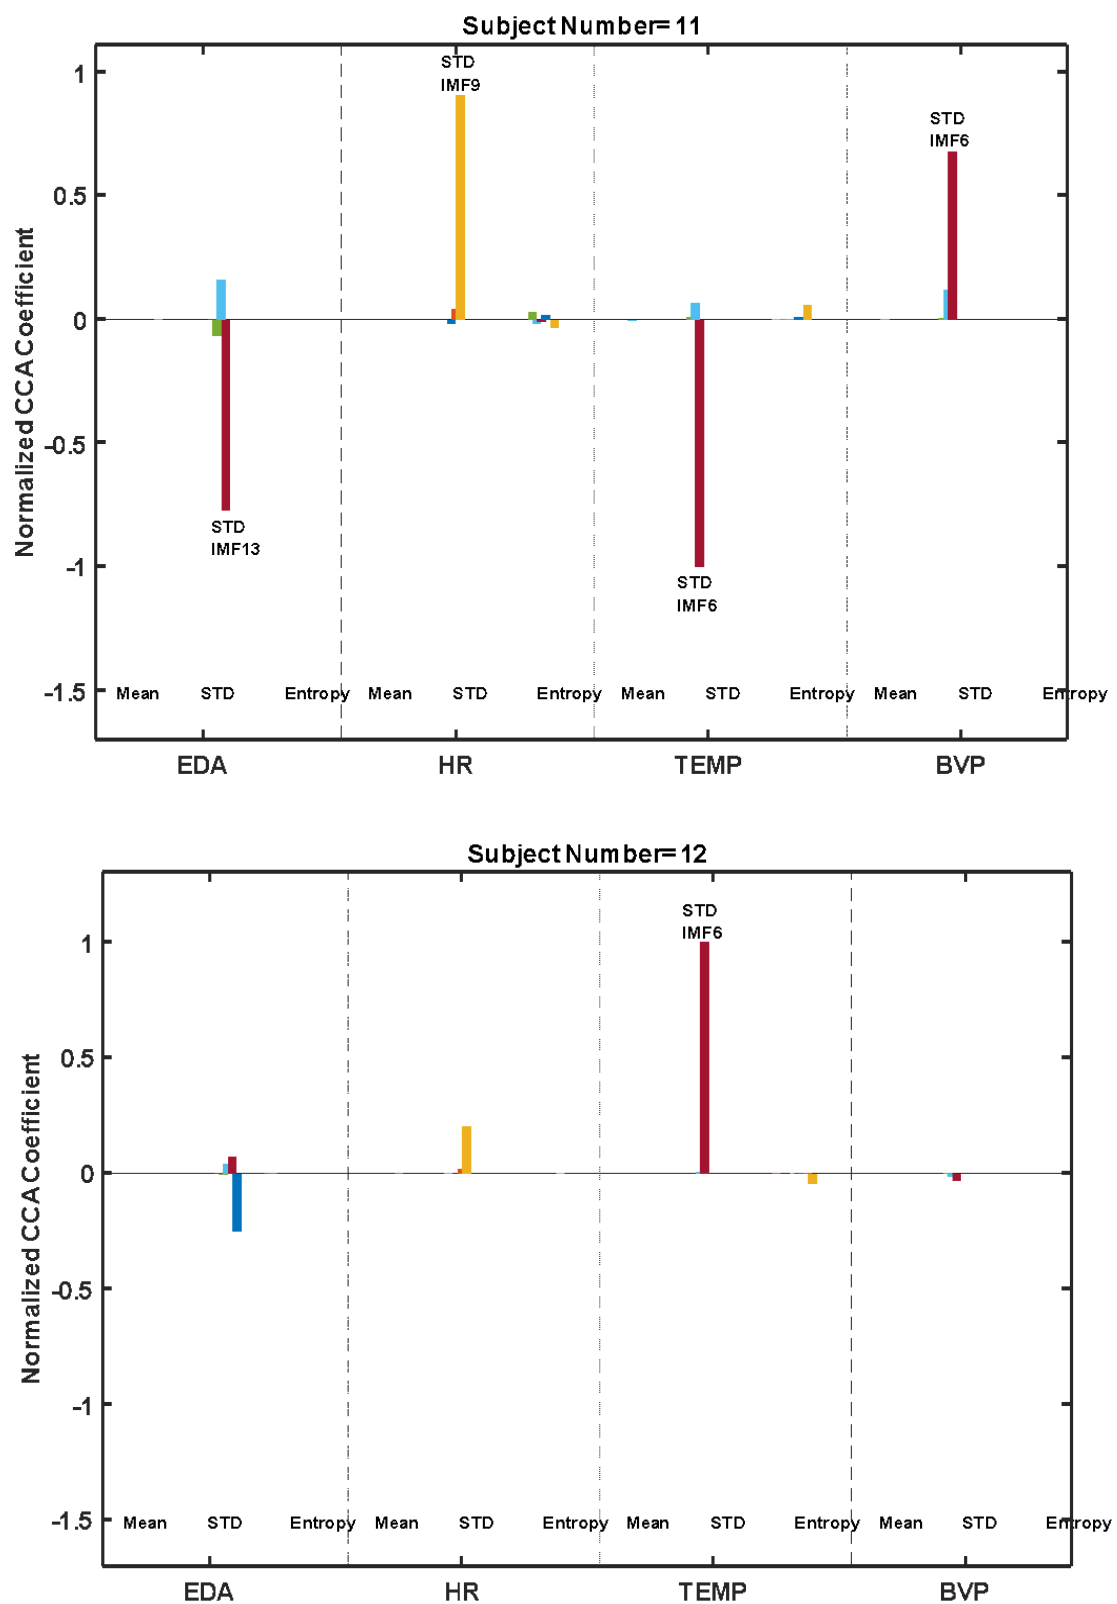

Figure S4. Normalized CCA coefficient weights for each feature obtained for each of 12 subjects.



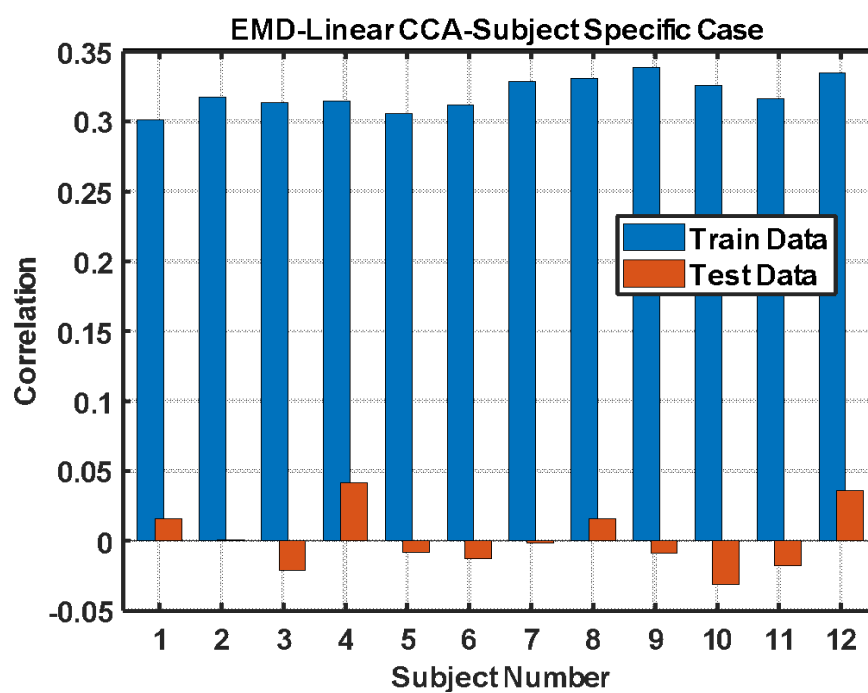

**Figure S5.** Correlation between a random vector with 2880 elements and extracted features of four sensor signals by subject-specific analysis. The subject number shows the experiment that 35 % of its 2880 samples were used as test data.

**Table S1.** P-value for computed correlation between test data of features and a random signal.

| Signals       | Subject Number |      |     |      |      |      |      |      |      |      |      |      |
|---------------|----------------|------|-----|------|------|------|------|------|------|------|------|------|
|               | 1              | 2    | 3   | 4    | 5    | 6    | 7    | 8    | 9    | 10   | 11   | 12   |
| Random Signal | 0.34           | 0.71 | 0.7 | 0.63 | 0.83 | 0.38 | 0.95 | 0.98 | 0.02 | 0.81 | 0.77 | 0.81 |
